# Supplementary material for: Molecular analysis of human Ero1 reveals novel regulatory mechanisms for oxidative protein folding
Source: PubMed Central journal article supplement (PMC6238587; doi:10.26508/lsa.201800090), 2018-06-26
Supplement: LSA-2018-00090_TableS2.pdf [file LSA-2018-00090_TableS2.pdf]

Table S2. Electrospray ionization mass spectrometric analysis of purified Ero1 $\beta$  complex. Ero1 $\beta$  co-purifies with PDI and both species, as well as the mixed disulfide species, are observed by mass spectrometry. Ero1 $\beta$  is produced with (phospho)gluconoylation of the N-terminal His tag (Geoghegan et al, 1999), with the gluconoylated species being the major state. For clarity, the other states of the N-terminal His tag (no modification and phosphogluconoylation) are not shown. The data are indicative that 12 of the 14 Cys in Ero1 $\beta$  are in a disulfide state.

| <b>NEM</b> | <b>Species observed</b>                 | <b>Expected mass (Da)</b> | <b>Experimental mass (Da)</b> | <b><math>\Delta</math>mass</b> | <b>Explanation</b>      |
|------------|-----------------------------------------|---------------------------|-------------------------------|--------------------------------|-------------------------|
| -          | Gluconoylated Ero1 $\beta$              | 51457                     | 51444                         | -13Da                          | 6 disulfides            |
|            | PDI                                     | 55425                     | 55421                         | -4Da                           | 2 disulfides            |
|            | Gluconoylated Ero1 $\beta$ -PDI complex | 106882                    | 106867                        | -15Da                          | 7 disulfides            |
| +          | Gluconoylated Ero1 $\beta$              | 51457                     | 51569                         | +112Da                         | One NEM<br>6 disulfides |
|            | Gluconoylated Ero1 $\beta$              | 51457                     | 51694                         | +237Da                         | Two NEM<br>6 disulfides |
|            | PDI                                     | 55425                     | 55546                         | +121Da                         | One NEM, 2 disulfides   |
|            | PDI                                     | 55425                     | 55670                         | +245Da                         | Two NEM, 2 disulfides   |
