# Supplementary material for: Molecular analysis of human Ero1 reveals novel regulatory mechanisms for oxidative protein folding
Source: PubMed Central journal article supplement (PMC6238587; doi:10.26508/lsa.201800090), 2018-06-26
Supplement: LSA-2018-00090_TableS3.pdf [file LSA-2018-00090_TableS3.pdf]

Table S3. Plasmids used in this study.

| Vector              | Background | Promoter | Expressed proteins                                                   |
|---------------------|------------|----------|----------------------------------------------------------------------|
| pKMK95 <sup>a</sup> | pMAL-c2x   | tac      | H <sub>6</sub> -Ero1 $\alpha$ (E24-H468)                             |
| pAM87 <sup>b</sup>  | pMAL-c2x   | tac      | H <sub>6</sub> -Ero1 $\alpha$                                        |
| pKMK209             | pMAL-c2x   | tac      | H <sub>6</sub> -Ero1 $\alpha$ , ERp57                                |
| pAM119              | pMAL-c2x   | tac      | H <sub>6</sub> -Ero1 $\alpha$ C166A                                  |
| pKMK123             | pMAL-c2x   | tac      | H <sub>6</sub> -Ero1 $\alpha$ C94/99A                                |
| pKMK126             | pMAL-c2x   | tac      | H <sub>6</sub> -Ero1 $\alpha$ C99/104A                               |
| pKMK128             | pMAL-c2x   | tac      | H <sub>6</sub> -Ero1 $\alpha$ C104/131A                              |
| pKMK130             | pMAL-c2x   | tac      | H <sub>6</sub> -Ero1 $\alpha$ C94/99/104/131A                        |
| pAM230              | pMAL-c2x   | tac      | H <sub>6</sub> -Ero1 $\alpha$ C208/241A                              |
| pAM2 <sup>c</sup>   | pMAL-c2x   | tac      | H <sub>6</sub> -Ero1 $\beta$ (Q34-R467, natural D129V/H465Q variant) |
| pAM215 <sup>d</sup> | pMAL-c2x   | tac      | H <sub>6</sub> -Ero1 $\beta$                                         |
| pAM216              | pMAL-c2x   | tac      | H <sub>6</sub> -Ero1 $\beta$ , ERp57                                 |
| pAM6                | pMAL-c2x   | tac      | H <sub>6</sub> -Ero1 $\beta$ C165A                                   |
| pAM218              | pMAL-c2x   | tac      | H <sub>6</sub> -Ero1 $\beta$ C90/95A                                 |
| pAM219              | pMAL-c2x   | tac      | H <sub>6</sub> -Ero1 $\beta$ C95/100A                                |
| pKMK212             | pMAL-c2x   | tac      | H <sub>6</sub> -Ero1 $\beta$ C100/130A                               |
| pAM220              | pMAL-c2x   | tac      | H <sub>6</sub> -Ero1 $\beta$ C90/95/100/130A                         |
| pOLR130             | pET23      | T7       | H <sub>6</sub> -PDI (D18-L508)                                       |
| pAP1                | pET23      | T7       | H <sub>6</sub> -PDIp (Q22-L525)                                      |
| pKMK177             | pET23      | tac      | H <sub>6</sub> -ERp57 (S25-L505)                                     |
| pHIA282             | pET23      | T7       | H <sub>6</sub> -ERp46 (R33-L432, natural variant R354K)              |
| pHIA64              | pET23      | T7       | H <sub>6</sub> -ERp72 (V21-L645)                                     |
| pAM194              | pET23      | tac      | H <sub>6</sub> -P5 (L20-L440)                                        |
| pAM139              | pET23      | tac      | H <sub>6</sub> T-PDI (D18-L508)                                      |
| pAM172              | pET23      | tac      | H <sub>6</sub> T-PDI3FLAG                                            |
| pAM227              | pET23      | tac      | H <sub>6</sub> -tDsbC-PDIp (Q22-L525)                                |
| pAM225              | pET23      | tac      | H <sub>6</sub> -tDsbC-ERp57 (S25-L505)                               |
| pAM226              | pET23      | tac      | H <sub>6</sub> -tDsbC-ERp46 (R33-L432, natural variant R354K)        |
| pAM223              | pET23      | tac      | H <sub>6</sub> -tDsbC-ERp72 (V21-L645)                               |
| pAM224              | pET23      | tac      | H <sub>6</sub> -tDsbC-P5 (L20-L440)                                  |
| pMJS333             | pET23      | tac      | H <sub>6</sub> -Erv1p (M1-H189)                                      |
| pMJS205             | pLysS      | tac      | Erv1p, PDI (D18-L508)                                                |
| pAM104              | pLysS      | tac      | Erv1p, PDI (D18-L508) C56A                                           |
| pKMK221             | pLysS      | tac      | Erv1p, PDI (D18-L508) C400A                                          |
| pAM110              | pLysS      | tac      | Erv1p, PDI (D18-L508) C53M/56A/397M/400A                             |

<sup>a</sup>All Ero1 $\alpha$  variants in the list are based on this vector; that is, they span the same residues.

<sup>b</sup>XhoI site restored to MCS to pKMK95 to prepare polycistronic vectors.

<sup>c</sup>All Ero1 $\beta$  variants in the list are based on this vector; that is, they span the same residues and contain the same natural mutation.

<sup>d</sup>XhoI site restored to MCS to pAM2 to prepare polycistronic vectors.

Abbreviations: H<sub>6</sub>, His tag; H<sub>6</sub>T, His tag followed by a TEV protease cleavage site; H<sub>6</sub>-tDsbC, His-tagged truncated DsbC followed by a TEV protease cleavage site.
