# Supplementary material for: Molecular analysis of human Ero1 reveals novel regulatory mechanisms for oxidative protein folding
Source: PubMed Central journal article supplement (PMC6238587; doi:10.26508/lsa.201800090), 2018-06-26
Supplement: LSA-2018-00090_TableS4.pdf [file LSA-2018-00090_TableS4.pdf]

Table S4. Biophysical attributes of purified proteins from the ProtParam tool (Gasteiger et al, 2005; <https://web.expasy.org/protparam/>).

| Protein produced                                           | Molecular weight (Da) | Extinction coefficient ( $M^{-1} \text{ cm}^{-1}$ ) |
|------------------------------------------------------------|-----------------------|-----------------------------------------------------|
| H <sub>6</sub> -Ero1 $\alpha$ -PDI                         | 108502.3              | 115960                                              |
| H <sub>6</sub> -Ero1 $\alpha$ C104/131A-PDI                | 108438.1              | 115835                                              |
| H <sub>6</sub> -Ero1 $\alpha$ C166A                        | 53045.0               | 70205                                               |
| H <sub>6</sub> -Ero1 $\alpha$ C208/241A                    | 53012.9               | 70080                                               |
| H <sub>6</sub> -Ero1 $\beta$ -PDI                          | 106703.7              | 117450                                              |
| H <sub>6</sub> -Ero1 $\beta$ C100/130A-PDI                 | 106639.6              | 117325                                              |
| H <sub>6</sub> -PDI (D18-L508)                             | 56379.2               | 45755                                               |
| H <sub>6</sub> -PDIp (Q22-L525)                            | 56919.4               | 44140                                               |
| H <sub>6</sub> -ERp57 (S25-L505)                           | 55350.4               | 45185                                               |
| H <sub>6</sub> -ERp46 (R33-L432,<br>natural variant R354K) | 45545.1               | 69620                                               |
| H <sub>6</sub> -ERp72 (V21-L645)                           | 71756.7               | 68105                                               |
| H <sub>6</sub> -P5 (L20-L440)                              | 46170.9               | 71765                                               |
| H <sub>6</sub> -Erv1p (M1-H189)                            | 22593.5               | 42315                                               |
| PDI (D18-L508) <sup>a</sup>                                | 55649.4               | 45755                                               |
| PDI3FLAG <sup>a</sup>                                      | 58634.3               | 50225                                               |
| PDIp (Q22-L525) <sup>a</sup>                               | 56199.7               | 44140                                               |
| ERp57 (S25-L505) <sup>a</sup>                              | 54620.6               | 45185                                               |
| ERp46 (R33-L432, natural<br>variant R354K) <sup>a</sup>    | 44815.4               | 69620                                               |
| ERp72 (V21-L645) <sup>a</sup>                              | 71027.0               | 68105                                               |
| P5 (L20-L440) <sup>a</sup>                                 | 46526.3               | 71765                                               |

<sup>a</sup>These constructs contain additional amino acids SHM in the N-terminus resulting from TEV protease cleavage.
